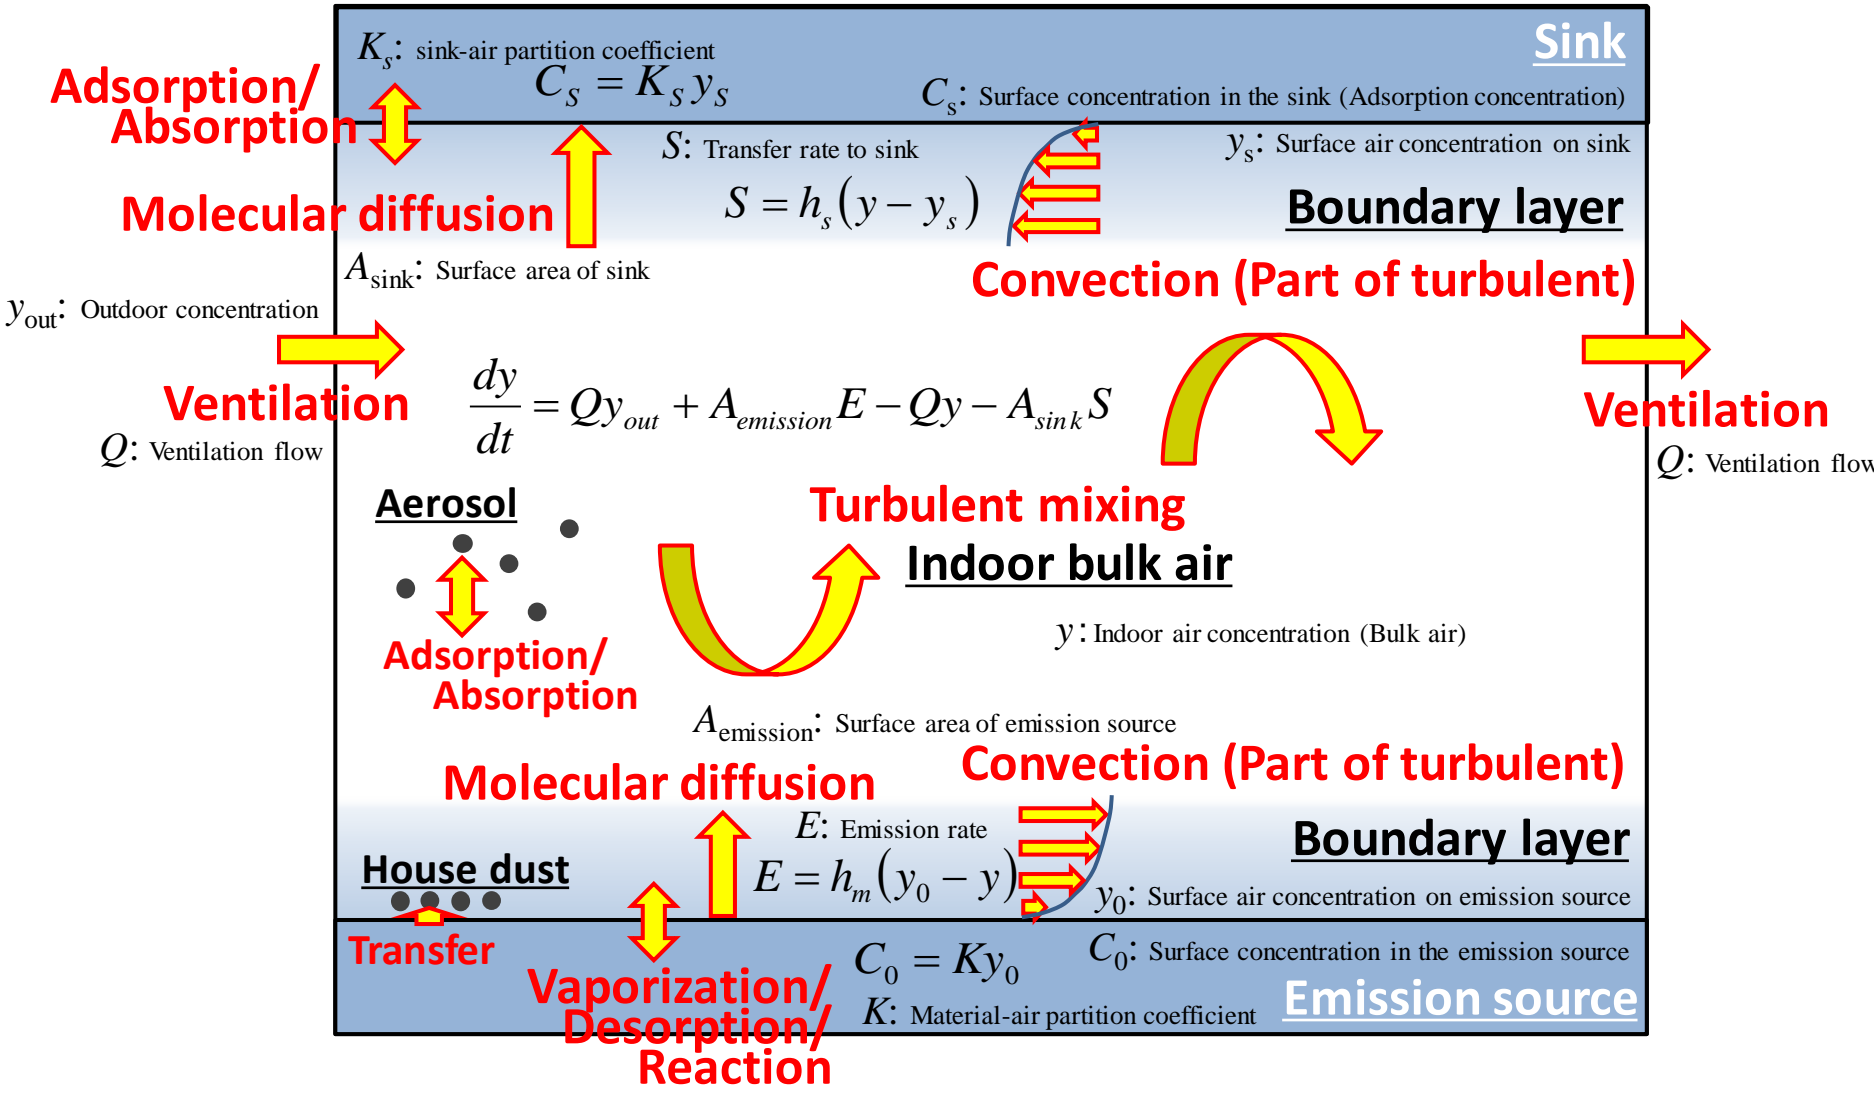

**S1 Figure.** Schematic representation of semi-volatile organic compounds (SVOCs) in an indoor environment (Detailed version).
