(A)

In-boundary layer diffusion limiting

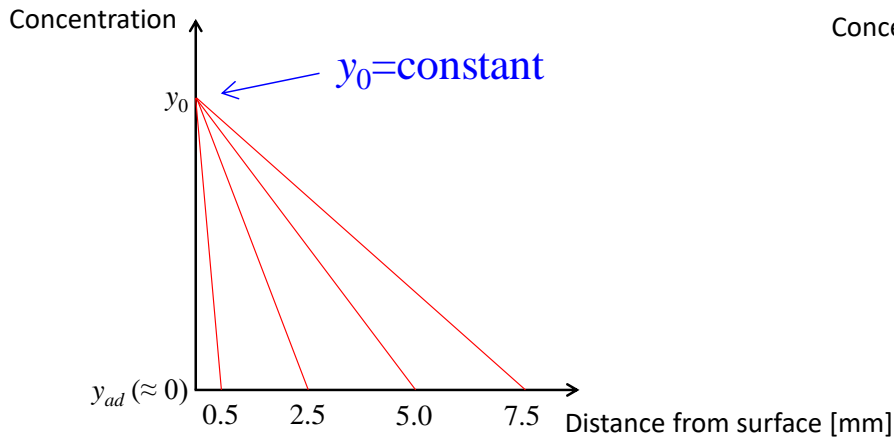

(B)

Inside-material diffusion (supply to surface) limiting

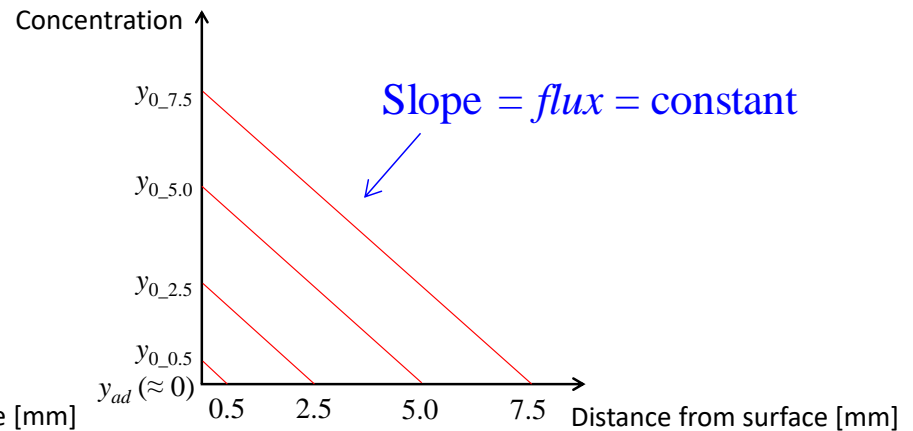

**S2 Figure.** Schematic diagram of the relationship between boundary layer air concentration and boundary layer thickness. (A) In-boundary layer diffusion limiting and (B) Inside-material diffusion (supply to surface) limiting.
