(A)

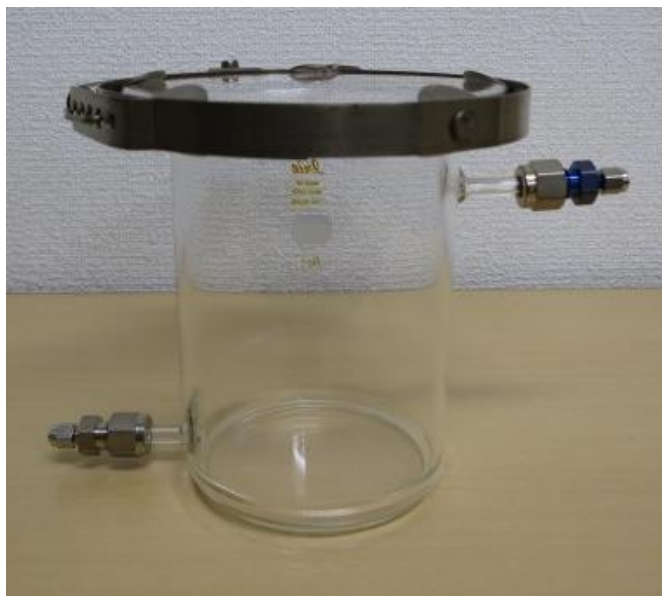

(B)

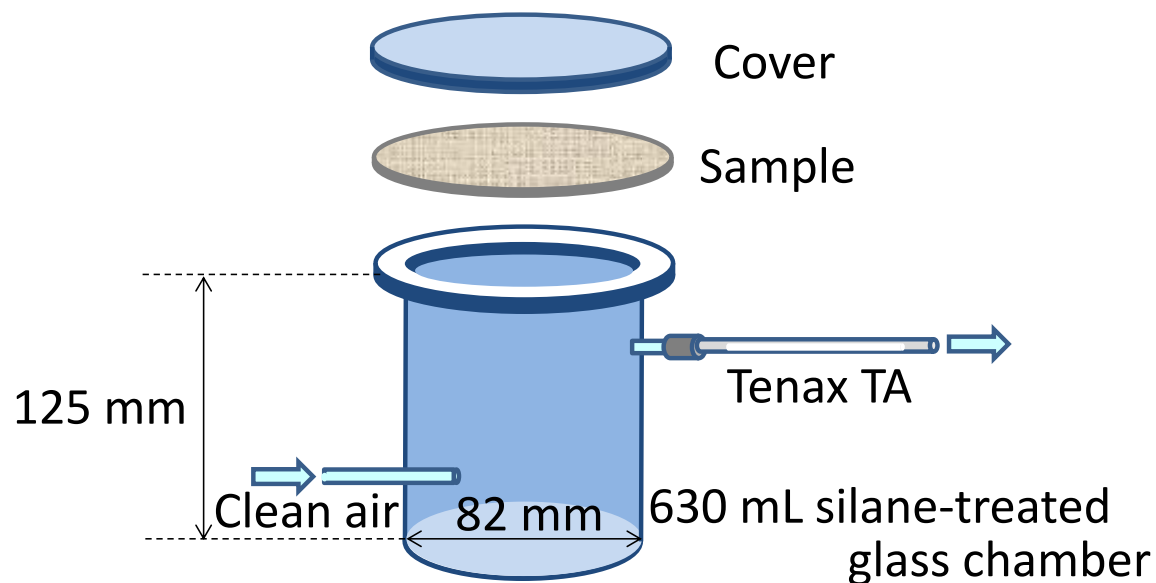

**S4 Figure.** (A) Photographs of microchamber and (B) diagram illustrating design of micro-chamber.
