# Supplementary material for: Emission characteristics of diethylhexyl phthalate (DEHP) from building materials determined using a passive flux sampler and micro-chamber
Source: PLOS journal article supplement (doi:10.1371/journal.pone.0222557), 2019-09-20
Supplement: S2 (10.1371/journal.pone.0222557.s002) [file journal.pone.0222557.s002]

**S2 Table.** Raw data of emission rates for different boundary thickness.

| Inverse of boundary thickness [1/m]                    |          | 2000         | 400 | 200  | 133            |
|--------------------------------------------------------|----------|--------------|-----|------|----------------|
| Boundary thickness [mm]                                |          | 0.50         | 2.5 | 5.0  | 7.5            |
| Emission rate<br>[ $\mu\text{g}/\text{m}^2/\text{h}$ ] | Sample A | 34           | 4.5 | 2.0  | 0.70           |
|                                                        | Sample B | 26           | 4.1 | 0.97 | 0.62           |
|                                                        | Sample C | $13 \pm 2.5$ | 8.8 | 3.1  | $2.4 \pm 0.49$ |
