# Supplementary material for: Emission characteristics of diethylhexyl phthalate (DEHP) from building materials determined using a passive flux sampler and micro-chamber
Source: PLOS journal article supplement (doi:10.1371/journal.pone.0222557), 2019-09-20
Supplement: S8 (10.1371/journal.pone.0222557.s008) [file journal.pone.0222557.s008]

### Sample A, B

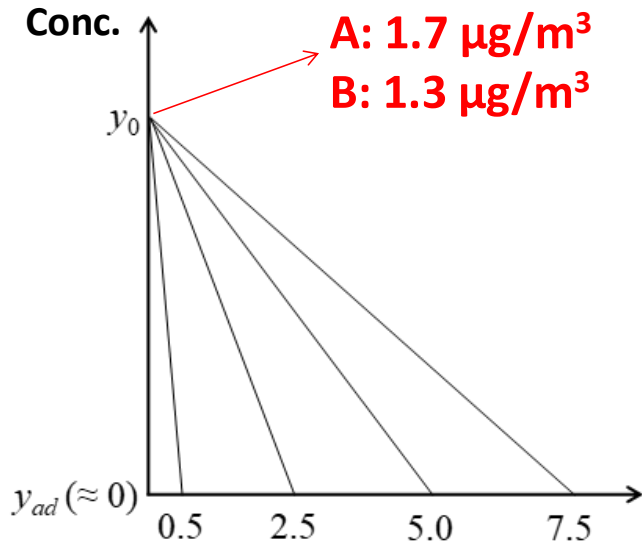

### Sample C

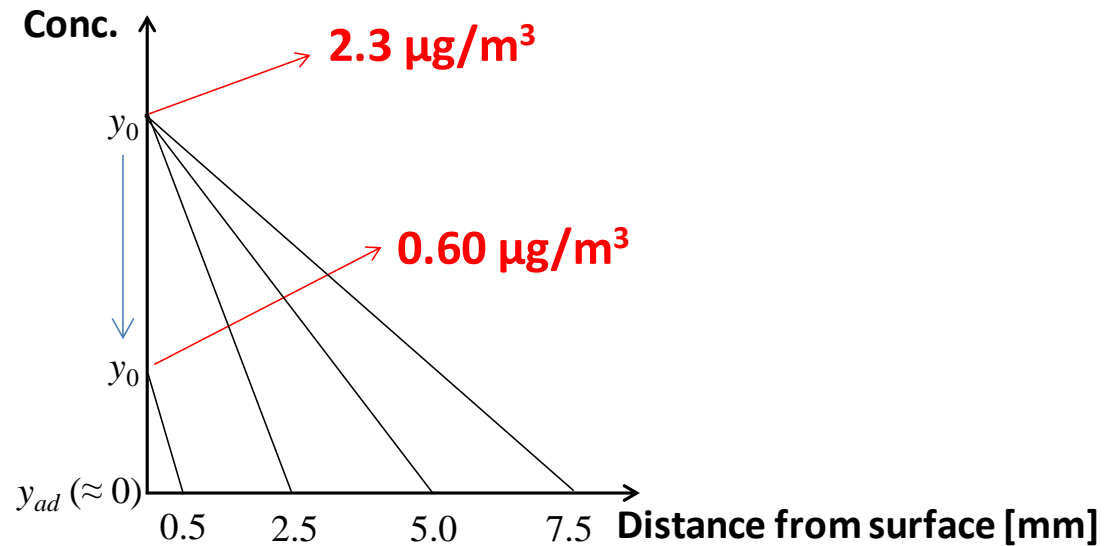

**S5 Figure.** Schematic diagram of surface concentration and concentration gradient for samples A, B, and C.
